# Supplementary material
Source: PubMed Central journal article supplement (PMC4839172)

## SUPPLEMENTARY DATA

### **Search strategy and selection criteria. Metabolomics biomarkers of prediabetes and type 2 diabetes**

References for this systematic review and meta-analysis were identified through searches of PubMed and EMBASE for articles published in any language from the earliest available online indexing year through August 2015, by use of the following approach:

((("metabolomics"[MeSH Terms] OR "metabolomics"[All Fields] OR "metabolome"[MeSH Terms] OR "metabolome"[All Fields]) AND ("diabetes mellitus"[MeSH Terms] OR ("diabetes"[All Fields] AND "mellitus"[All Fields]) OR "diabetes mellitus"[All Fields] OR "diabetes"[All Fields] OR "type 2 diabetes"[All Fields] OR "metabolic diseases"[MeSH Terms] OR "insulin resistance"[All Fields] OR "insulin sensitivity"[ All fields] OR "metabolic syndrome x"[MeSH Terms] OR "metabolic syndrome"[All Fields] OR "HOMA-IR"[All Fields] OR "HOMA-  $\beta$  "[All Fields] OR "impaired glucose" [All Fields] OR "impaired fasting insulin" [All Fields] ) AND "humans"[MeSH Terms])).  
Articles resulting from these searches and relevant references cited in those articles were reviewed.

SUPPLEMENTARY DATA

**Supplementary Table 1. Case-Control and Non-Prospective Population-Based Metabolomics Studies in Type 2 Diabetes.**

| Author –year – journal                       | Study – population                                                              | Study design | N, follow-up                               | Technique and metabolite targets                             | Biological sample | Outcome                                                                 | Significant findings                                                                                                                                                                              |
|----------------------------------------------|---------------------------------------------------------------------------------|--------------|--------------------------------------------|--------------------------------------------------------------|-------------------|-------------------------------------------------------------------------|---------------------------------------------------------------------------------------------------------------------------------------------------------------------------------------------------|
| Messana <i>et al.</i> 1988– <i>Clin Chem</i> | Universita Cattolica del Sacro Cuore – Italy                                    | Case-control | 53 (20 nondiabetic/33 T2D)                 | H NMR<br>Targeted (17 amino acids)                           | Urine             | T2D                                                                     | <b>Amino acids</b><br>(↑) lactate, alanine, citrate, DMA (dimethylamine), TMAO (trimethylamine-N-oxide), hippurate, glycine, creatine, acetate, betaine, acetone, acetoacetate, β-hydroxybutyrate |
| Wang <i>et al.</i> 2005– <i>Anal Chem</i>    | Second Affiliated Hospital of Dalian Medical University (Dalian, China) – China | Case-control | 69 (35 nondiabetic/34 T2D)                 | LC/MS<br>Targeted (83 phospholipids)                         | Plasma            | T2D                                                                     | <b>Lipids</b><br>(↑) phosphoethanolamines (PE), lysophosphocholine (LPC)                                                                                                                          |
| Yuan <i>et al.</i> 2007– <i>J Chromatog</i>  | Second Affiliated Hospital of Dalian Medical University (Dalian, China) – China | Case-control | 79 (26 nondiabetic/28 T2D)                 | GC-MS<br>Targeted (195 organic acids)                        | Urine             | T2D                                                                     | <b>Organic acids</b><br>5 organic acids associated with T2D:<br>(↑) 4-Aminobenzoic acid<br>(↓) Maleic acid, dimethyl ester, acetic acid, 2,5-bisoxo-benzeneacetic acid                            |
| Li <i>et al.</i> 2008– <i>Anal Chem Acta</i> | Zhejiang Affiliated Hospital of Zhejiang TCM University – China                 | Case-control | 79 (31 nondiabetic/48 T2D)                 | GC X GC – TOFMS<br>Targeted (73 sugar and lipid metabolites) | Plasma            | T2D                                                                     | <b>Lipids and sugar metabolites</b><br>5 associated with T2D<br>(↑) glucose, 2-hydroxybutyric acid, linoleic acid, palmitic acid, phosphate                                                       |
| Haus <i>et al.</i> 2009– <i>Diabetes</i>     | San Antonio Area – USA                                                          | Case-control | 27 (14 lean healthy controls/13 obese T2D) | GC-MS/MS<br>Targeted (at least 7 ceramides)                  | Plasma            | Prediabetes (insulin sensitivity by hyper-insulinemic-euglycemic clamp) | <b>Ceramides</b><br>(↓) ceramides C18:0 (N-stearoylsphingosine), C20:0 (N-eicosanoylsphingosine), C24:1, and total ceramides (inversely associated with insulin sensitivity)                      |
|                                              |                                                                                 |              |                                            |                                                              |                   | T2D                                                                     | (↑) ceramides C18:0, C20:0, C24:1 and total ceramides<br>(↑) TNF-α                                                                                                                                |

SUPPLEMENTARY DATA

|                                                        |                                                                                                                                                                                                                                                                               |              |                                                                                                  |                                                                                                  |                        |                                                                              |                                                                                                                                                                                                                                                                                                                                                                                 |
|--------------------------------------------------------|-------------------------------------------------------------------------------------------------------------------------------------------------------------------------------------------------------------------------------------------------------------------------------|--------------|--------------------------------------------------------------------------------------------------|--------------------------------------------------------------------------------------------------|------------------------|------------------------------------------------------------------------------|---------------------------------------------------------------------------------------------------------------------------------------------------------------------------------------------------------------------------------------------------------------------------------------------------------------------------------------------------------------------------------|
| Adams <i>et al.</i><br>2009– <i>J Nutr</i>             | SUGAR-Project,<br>African-<br>American women<br>– USA                                                                                                                                                                                                                         | Case-control | 56 (12 obese non<br>diabetic<br><br>With or without<br>UCP3 g/a<br>polymorphism/44<br>obese T2D) | HPLC-MS<br><br>Targeted (42<br>acylcarnitines)                                                   | Plasma                 | T2D                                                                          | <b>Acylcarnitines</b><br><br>11 acylcarnitines associated with T2D<br><br>(↑) total-free acylcarnitines, C6 (hexanoyl<br>carnitine), C8 (octanoyl carnitine), cis-3,4-<br>methylene-nonanoyl carnitine, C14<br>(myristoyl carnitine), C18:1 (oleoyl<br>carnitine), (C8-dicarb (suberoyl carnitine),<br>summed C10-C14, total acylcarnitines<br><br>(↓) C3 (propionyl carnitine) |
| Zhang <i>et al.</i><br>2009– <i>J<br/>Proteome Res</i> | Xiamen Hospital<br>– China                                                                                                                                                                                                                                                    | Case-control | 231 (80 nondiabetic,<br>74 T2D, 77 IFG)                                                          | H NMR<br><br>Targeted (at least<br>30 metabolites,<br>amino acids, lipids,<br>sugar metabolites) | Serum                  | Prediabetes<br>(OGTT,<br>HOMA-IR)                                            | <b>BCAA, amino acids and sugar<br/>metabolites</b><br><br>(↑) glucose<br><br>(↓) lactate, alanine, tyrosine, phenylalanine,<br>histidine, glutamine                                                                                                                                                                                                                             |
|                                                        |                                                                                                                                                                                                                                                                               |              |                                                                                                  |                                                                                                  |                        | T2D                                                                          | (↑) glucose<br><br>(↓) BCAAs (isoleucine, leucine, valine),<br>alanine, methionine, glutamine, citrate,<br>lysine, choline, HDL-c, lactate, tyrosine,<br>phenylalanine, histidine                                                                                                                                                                                               |
| Zhang <i>et al.</i><br>2009– <i>Anal<br/>Chem Acta</i> | Xiamen Hospital<br>– China                                                                                                                                                                                                                                                    | Case-control | 58 (25 nondiabetic/33<br>T2D)                                                                    | UPLC-oaTOF-MS<br><br>Untargeted<br>(>15000<br>metabolite<br>features)                            | Serum                  | T2D                                                                          | <b>Lipids and amino acids</b><br><br>(↓) Sphingolipids (phytosphingosine,<br>dihydrosphingosine), leucine                                                                                                                                                                                                                                                                       |
| Newgard <i>et al.</i><br>2009– <i>Cell<br/>Metab</i>   | Weight Loss<br>Maintenance<br>Study (WLM)<br>(n=112); Duke<br>University<br>Bariatric Surgery<br>Program (n= 13);<br>Duke Diet and<br>Fitness Center<br>(n= 9); low-<br>carbohydrate,<br>ketogenic diet<br><br>program (n= 4);<br>and Structure<br>House (n= 3) in<br>African | Case-control | 141 (74 obese/67<br>lean healthy controls)                                                       | GC-MS/MS<br><br>Targeted (98<br>metabolites, amino<br>acids, lipids,<br>acylcarnitines)          | Serum<br>and<br>plasma | Prediabetes<br><br>(intravenous<br>glucose<br>tolerance<br>testing,<br>HOMA) | <b>BCAA</b><br><br>(↑) BCAA<br><br>(↑) C16:1 (palmitoleate)                                                                                                                                                                                                                                                                                                                     |

SUPPLEMENTARY DATA

| Americans – USA                                |                                                                 |                                |                                                                                                               |                                                                                                                                            |                                            |                                                                                                             |                                                                                                                                                                                                                                                                                                                                                                                                                                           |
|------------------------------------------------|-----------------------------------------------------------------|--------------------------------|---------------------------------------------------------------------------------------------------------------|--------------------------------------------------------------------------------------------------------------------------------------------|--------------------------------------------|-------------------------------------------------------------------------------------------------------------|-------------------------------------------------------------------------------------------------------------------------------------------------------------------------------------------------------------------------------------------------------------------------------------------------------------------------------------------------------------------------------------------------------------------------------------------|
| Tai <i>et al.</i> 2010–<br><i>Diabetologia</i> | Cross-sectional survey Asian-Indian and Chinese men – Singapore | Cohort, population-based study | 263 men (97 Chinese low HOMA/83 Chinese high HOMA)<br><br>30 Asian-Indian low HOMA/53 Asian-Indian high HOMA) | MS/MS (plasma amino acids) and GC/MS (urine organic acids)<br><br>Targeted (at least ten amino acids, 45 acylcarnitines, 20 organic acids) | Plasma amino acids and urine organic acids | Prediabetes (HOMA-IR)                                                                                       | <b>BCAA, acylcarnitines, organic acids</b><br><br>(↑) BCAAs (valine, leucine/isoleucine), alanine, proline, phenylalanine, tyrosine, glutamate/glutamine, ornithine<br><br>(↑) C10:1 and C8:1 acylcarnitines<br><br>Also combination of these metabolites using principal component analysis                                                                                                                                              |
| Lucio <i>et al.</i> 2010–<br><i>Plos One</i>   | University Clinic in Tübingen – Germany                         | Cohort, population-based study | 46 nondiabetic                                                                                                | Infusion ion cyclotron resonance Fourier transform – MS<br><br>Untargeted (>15000 metabolite features)                                     | Plasma                                     | Prediabetes (OGTT, ISI <sub>Matsuda</sub> )                                                                 | <b>Lipids and sugar metabolites</b><br><br>Metabolites altered in subjects with reduced insulin sensitivity: arachidonic acid, steroid hormone biosynthesis, bile acid biosynthesis metabolites, linoleic and α-linoleic acid, biosynthesis of unsaturated fatty acids, retinol metabolism, sphingolipid metabolism, galactose metabolism, fructose and mannose metabolism, phenylalanine metabolism, fatty acid biosynthesis metabolites |
| Mihalik <i>et al.</i> 2010–<br><i>Obesity</i>  | University of Pittsburgh –USA                                   | Case-control                   | 36 (12 nondiabetic/14 obese nondiabetic/<br><br>10 T2D)                                                       | HPLC-ESI-MS/MS<br><br>Targeted (46 acylcarnitines)                                                                                         | Plasma                                     | Prediabetes (OGTT, euglycemic-hyperinsulinemic clamp with variable intravenous glucose infusion)<br><br>T2D | <b>Acylcarnitines</b><br><br>In response to insulin infusion, a significant decrease in every acylcarnitine species detected between carbon lengths of 2 and 18<br><br>(↑) C3 (propionyl carnitine), C5 (isovaleryl carnitine), C8 (octanoyl carnitine), C4-OH (3-hydroxy-butyl carnitine), C4-DC (C4-dicarboxylcarnitine), C5-OH (3-hydroxy-isovaleryl carnitine), C6-OH (hydroxyhexanoylcarnitine), free carnitine                      |
| Fiehn <i>et al.</i> 2010–<br><i>Plos One</i>   | SUGAR-Project, African-American women                           | Case-control                   | 56 women (12 obese nondiabetic/44 obese diabetic)                                                             | GC-TOF-MS<br><br>Untargeted (>350 metabolite)                                                                                              | Plasma                                     | Prediabetes (HbA1c)                                                                                         | <b>Amino acids, acylcarnitines, sugar metabolites</b><br><br>(↑) BCAAs, acylcarnitines                                                                                                                                                                                                                                                                                                                                                    |

SUPPLEMENTARY DATA

|                                                  |                                                                                           |              |                                                                                                   |                                                                            |                        |                       |                                                                                                                                                                                                                                                                                                                                                                                                                                                                                                                                                                                                                                                                                                                                                          |
|--------------------------------------------------|-------------------------------------------------------------------------------------------|--------------|---------------------------------------------------------------------------------------------------|----------------------------------------------------------------------------|------------------------|-----------------------|----------------------------------------------------------------------------------------------------------------------------------------------------------------------------------------------------------------------------------------------------------------------------------------------------------------------------------------------------------------------------------------------------------------------------------------------------------------------------------------------------------------------------------------------------------------------------------------------------------------------------------------------------------------------------------------------------------------------------------------------------------|
|                                                  | - USA                                                                                     |              |                                                                                                   | features)                                                                  |                        | T2D                   | 36 metabolites higher and 59 lower in T2D<br><br>(↑) long-chain fatty acids and carbohydrate derivatives: oleic acid, gluconic acid, fructose, palmitoleic acid, 3,6-anhydrogalactose, glucuronic acid, glucose, heptadecanoic acid, inulobiose, 2-deoxyerythritol, palmitic acid, uridine, cysteine, xylose, stearic acid<br><br>(↑) amino acids and derivatives: leucine, 2-ketoisocaproate, valine, cysteine, histidine<br><br>(↓) benzylalcohol, benzoic acid, lysine, ethanolamine, arachidonic acid, glycine, glycerol-3-phosphate                                                                                                                                                                                                                 |
| Gall <i>et al.</i> 2010–<br><i>Plos One</i>      | EGIR-RISC –<br>Europe                                                                     | Case-control | 399 nondiabetic (256<br>normal glucose<br>tolerance, 82<br>impaired glucose<br>tolerance, 61 IFG) | GC/MS<br>UHPLC/MS/MS<br>Untargeted (485<br>metabolite<br>features)         | Plasma                 | Prediabetes<br>(OGTT) | <b>BCAA and lipids</b><br><br>(↑) α-hydroxybutyrate, 3-methyl-2-oxobutyrate, cysteine, creatinine, isoleucine, adrenate, stearate, palmitate (16:0)<br><br>(↓) glycine, serine                                                                                                                                                                                                                                                                                                                                                                                                                                                                                                                                                                           |
| Suhre <i>et al.</i><br>2010– <i>Plos One</i>     | Cooperative<br>Health Research<br>in the Region of<br>Augsburg<br>(KORA men) –<br>Germany | Case-control | 100 men (60<br>nondiabetic/40 T2D)                                                                | UHPLC/MS/MS/<br>GC-MS<br>NMR<br>Untargeted (420<br>metabolite<br>features) | Serum<br>and<br>Plasma | T2D                   | <b>Sugar metabolites, ketone bodies, BCAAs</b><br><br>(↑) desoxyhexose, glucose, glycolipids (H3-HNAc2-NANA, HNAc, HNAc-H2-dH) uronic acid, dihexose, mannose, creatinine, glutamylvaline, gamma-glutamylisoleucine, β-hydroxybutyrate, PAGN, phenylalanine, 3-indoxyl sulfate, kynurenine, homocitrulline, myristate, palmitate, 2-hydroxypalmitate, margarate, 10-heptadecenoate, stearate, 2-hydroxystearate, oleate, linoleate, linoleamide, linolenate, eicosenoate, dihomα-linolenate, adrenate, isoleucine, leucine, gamma-glutamylleucine, valine<br><br>(↓) 1,5-anhydroglucitol, caproate, heptanoate, pelargonate, glycerophosphorylcholine, PC a C20:4, PC aa (OH, COOH) C28:4, PC aa C34:4, SM C14:0, SM C22:2, 10-undecenoate, arachidonate |
| Han <i>et al.</i> 2011–<br><i>Anal Chem Acta</i> | China-Japan<br>Friendship                                                                 | Case-control | 60 (30 nondiabetic/<br>30 T2D)                                                                    | GC-MS<br>Targeted (25 fatty                                                | Plasma                 | T2D                   | <b>Lipids</b>                                                                                                                                                                                                                                                                                                                                                                                                                                                                                                                                                                                                                                                                                                                                            |

SUPPLEMENTARY DATA

|                                                  |                                                                                                   |                          |                                                                     |                                                           |        |                                                       |                                                                                                                                                                                                                                                                                                                                                                                         |
|--------------------------------------------------|---------------------------------------------------------------------------------------------------|--------------------------|---------------------------------------------------------------------|-----------------------------------------------------------|--------|-------------------------------------------------------|-----------------------------------------------------------------------------------------------------------------------------------------------------------------------------------------------------------------------------------------------------------------------------------------------------------------------------------------------------------------------------------------|
|                                                  | Hospital – China                                                                                  |                          |                                                                     | acids)                                                    |        |                                                       | 21 significantly associated<br><br>(↑) non-esterified fatty acids (C16:0, C18:2, C18:1, 18:0, C20:4, C20:3, C20:2, C20:0, C20:6)<br><br>(↓) esterified fatty acids (C10:0, C14:0, C16, C16:1n-9, C18:2, C18:1n-9, C18:0, C20:4, C20:5, C20:3, C20:2, C22:6)                                                                                                                             |
| Ha <i>et al.</i> 2012–<br><i>Clin Endocrinol</i> | National Health Insurance Corporation Ilsan hospital – Korea (men)                                | Case-control             | 53 men (27 nondiabetic/26 T2D)                                      | UPLC/Q-TOF MS<br><br>Untargeted (382 metabolite features) | Plasma | T2D                                                   | <b>Lipids</b><br><br>(↑) dodecanoic acid, myristic acid, leucine, lysine, phenylalanine, propionyl carnitine, octanoyl carnitine, decanoyl carnitine, dodecanoyl carnitine, palmityl carnitine, heptadecanoyl carnitine, linoleyl carnitine, vaccenyl carnitine, lysoPC (14:0, 16:0, 16:1, 18:1, 18:2, 18:3, 20:5, 22:6), lysoPE (18:2, 22:6)<br><br>(↓) serine, LPC (18:0), LPE (18:1) |
| Würtz <i>et al.</i> 2012–<br><i>Diabetes</i>     | Northern Finland Birth Cohort (NFBC) and Cardiovascular Risk in Young Finns Study (YFS) – Finland | Cohort, population-based | 7098 nondiabetic                                                    | NMR<br><br>Targeted (39 amino acids, lipid)               | Serum  | Prediabetes (HOMA-IR)                                 | <b>Amino acids and lipid</b><br><br>20 metabolites were associated with HOMA-IR<br><br>(↑) BCAAs, phenylalanine, tyrosine, glycolysis and gluconeogenesis intermediates, total fatty acids, n-3, n-6 and n-7, phosphocholines, phosphoglycerides,<br><br>(↓) glutamine, acetoacetate, 3-hydroxybutyrate,                                                                                |
| Zhou <i>et al.</i> 2013–<br><i>Clin Bioc</i>     | Dahua Hospital and Xuhui District Central Hospital – China                                        | Case-control             | 226 [100 nondiabetic (80 obese/20 lean)/126 T2D (31 obese/95 lean)] | LC-MS/MS<br><br>Targeted (42 amino acids)                 | Plasma | Prediabetes (fasting glucose, HbA1c, fasting insulin) | <b>BCAAs and amino acids</b><br><br>Related to fasting glucose:<br>(↑) proline<br>(↓) cystathionine, citrulline<br><br>Related to HbA1c:<br>(↑) proline<br>(↓) glycine, sarcosine<br><br>Related to fasting insulin:<br>(↑) alanine, 3-methylhistidine<br>(↓) aminobutyric acid, asparagine, cystathionine                                                                              |

SUPPLEMENTARY DATA

|                                           |                                                                              |              |                                                     |                                                        |        |                   |                                                                                                                                                                                                                                                                                                                                                                                                                                                              |
|-------------------------------------------|------------------------------------------------------------------------------|--------------|-----------------------------------------------------|--------------------------------------------------------|--------|-------------------|--------------------------------------------------------------------------------------------------------------------------------------------------------------------------------------------------------------------------------------------------------------------------------------------------------------------------------------------------------------------------------------------------------------------------------------------------------------|
|                                           |                                                                              |              |                                                     |                                                        |        | T2D               | 16 amino acid lower and 11 higher in T2D<br><br>(↑) hydroxyproline, glutamine, ethanolamine, citrulline, sarcosine, β-alanine, glutamate, 3-methyl histidine, 4-aminobutyric acid, 3-aminoisobutyric acid, proline<br><br>(↓) phosphoserine, phosphoric acid ethanolamine, taurine, serine, aspartate, histidine, 1-methylhistidine, arginosuccinic acid, carnosine, anserine, amino adipic acid, δ-hydroxylysine, lysine, homocysteine, leucine, tryptophan |
| Menni <i>et al.</i> 2013– <i>Diabetes</i> | Twins UK women – UK                                                          | Case-control | 2204 (1897 nondiabetic/192 individuals IFG/115 T2D) | UPLC-MS/MS<br><br>Untargeted (447 metabolite features) | Plasma | Prediabetes (IFG) | <b>BCAAs, lipids and sugar metabolites</b><br><br>14 metabolites associated with IFG (1 unknown)<br><br>(↑) BCKAs (3-methyl-2-oxovalerate, derivative of isoleucine)<br><br>(↑) 2-hydroxybutyrate, 3-methyl-2-butyrate, 4-methyl-2-oxo-pentanoate<br><br>(↑) leucine, isoleucine, arachidonate, adrenate, urate, glucose, mannose, fructose, and erythritol                                                                                                  |
|                                           |                                                                              |              |                                                     |                                                        |        | T2D               | 42 metabolites associated with T2D (14 unknown)<br><br>(↑) BCKAs (3-methyl-2-oxovalerate (derivative of isoleucine)<br><br>(↑) sugar metabolites (glucose, mannose, malate, arabinose, fructose, lactate,)<br><br>(↓) 5-dodecenoat, heptanoat, pelargonate, 1,5-anhydroglucitol (shorter chain)<br><br>(↑) medium and long-chain free fatty acids (adrenate, arachidonate)<br><br>(↑) BCAAs or derivatives (valine, isoleucine, leucine, proline)            |
|                                           | <b>Replication:</b><br>Cooperative Health Research in the Region of Augsburg | Case-control | 720 (184 healthy controls/536 IFG)                  | LC-MS/MS<br><br>Targeted (3-methyl-2-oxovalerate)      | Plasma | Prediabetes (IFG) | (↑) BCKAs (3-methyl-2-oxovalerate (derivative of isoleucine)                                                                                                                                                                                                                                                                                                                                                                                                 |

SUPPLEMENTARY DATA

| (KORA) – Germany                                |                                        |                                |                                         |                                                                                                                            |                  |                       |                                                                                                                                                                                                                                                                                                                                                                                                                |
|-------------------------------------------------|----------------------------------------|--------------------------------|-----------------------------------------|----------------------------------------------------------------------------------------------------------------------------|------------------|-----------------------|----------------------------------------------------------------------------------------------------------------------------------------------------------------------------------------------------------------------------------------------------------------------------------------------------------------------------------------------------------------------------------------------------------------|
| Xu <i>et al.</i> 2013–<br><i>JCEM</i>           | School of Public Health – Singapore    | Case-control                   | 111 (60 healthy controls/24 IFG/27 T2D) | LC-MS and GC-MS<br><br>Targeted (238 metabolites, amino acid, lipid and sugar metabolites)                                 | Plasma           | Prediabetes (HOMA-IR) | <b>BCAAs, lipids, sugar metabolites</b><br><br>(↑) fructose, $\alpha$ -hydroxybutyrate,<br>(↑) alanine, proline, phenylalanine, glutamine<br>(↑) BCAAs (isoleucine, valine, leucine)<br>(↑) low carbon number lipids (myristic, palmitic, stearic acid)<br>(↓) pyroglutamic acid, glycerophospholipids, and sphingomyelins                                                                                     |
|                                                 |                                        |                                |                                         |                                                                                                                            |                  | T2D                   | (↑) fructose, $\alpha$ -hydroxybutyrate,<br>(↑) alanine, proline, phenylalanine, glutamine<br>(↑) BCAAs (isoleucine, valine, leucine)<br>(↑) low carbon number lipids (myristic, palmitic, stearic acid)<br>(↓) pyroglutamic acid, glycerophospholipids, sphingomyelins                                                                                                                                        |
| Kaur <i>et al.</i> 2013–<br><i>Mol Bio Syst</i> | Hamad Medical Hospital – Qatar         | Case-control                   | 182 (77 nondiabetic/105 T2D)            | UPLC-ESI-QTOF-MS<br><br>Untargeted (>1500 metabolite features) and targeted (nine amino acid, lipid and sugar metabolites) | Plasma and Urine | T2D                   | <b>Amino acids, TCA cycle</b><br><br>Plasma:<br>(↑) itaconic acid, leucine, 3-hydroxymethylglutaric acid, PC (18:0/0:0), sphingosine-1-phosphate, PG (18:0/18:1)<br>(↓) inosine, uric acid, succinic acid, taurine, PE (P16:0/22:6)<br><br>Urine:<br>(↑) N-acetyl-D-phenylalanine, serotonin<br>(↓) 2-ketobutyric acid, 2-ketoglytaric acid, 1-methylhistidine, kynurenic acid, xanthurenic acid, pyruvic acid |
| Ho <i>et al.</i> 2013–<br><i>Diabetes</i>       | Framingham Heart Study Offspring – USA | Cohort, population-based study | 377 nondiabetic                         | LC/MS-MS<br><br>Targeted (110 metabolites, amino acids, purine)                                                            | Plasma           | Prediabetes (OGTT)    | <b>Amino acids, urea cycle, purines/pyrimidines, sugar metabolites</b><br><br>73 metabolites decreased after OGTT:<br>(↓) amino acids, $\beta$ -hydroxybutyrate,                                                                                                                                                                                                                                               |



SUPPLEMENTARY DATA

|                                            |                                                                        |                                |                                                        |                                                                                                  |        |                    |                                                                                                                                                                                                                                                                                                               |
|--------------------------------------------|------------------------------------------------------------------------|--------------------------------|--------------------------------------------------------|--------------------------------------------------------------------------------------------------|--------|--------------------|---------------------------------------------------------------------------------------------------------------------------------------------------------------------------------------------------------------------------------------------------------------------------------------------------------------|
|                                            |                                                                        |                                |                                                        | nucleotides, sugar metabolites, organic acids)                                                   |        |                    | tricarboxylic acid cycle intermediates, serotonin derivatives, urea cycle metabolites (citrulline, ornithine and arginine) and B vitamins, unconjugated bile acids, nitrogenous bases (purines and pyrimidines)<br><br>18 increased after OGTT:<br>(↑) glycolysis products, conjugated bile acids             |
| Meikle <i>et al.</i> 2013– <i>Plos One</i> | Australian Diabetes, Obesity and Lifestyle Study (AusDiab) – Australia | Case-control                   | 351 (170 normoglycemics, 64 prediabetic and 117 T2D)   | LC/MS-MS<br>Targeted (65 diacylglycerol and triacylglycerol species and 194 other lipid species) | Plasma | Prediabetes (OGTT) | <b>Lipids</b><br>Significant associations with 134 individual lipids<br><br>(↑) dihydroceramide, ceramide, phosphatidylethanolamine, phosphatidylinositol, phosphatidylglycerol, free cholesterol, cholesterol ester, diacylglycerol, triacylglycerol<br><br>(↓) Trihexosylceramide, alkylphosphatidylcholine |
|                                            |                                                                        |                                |                                                        |                                                                                                  |        | T2D                | <b>Lipids</b><br>Significant associations with 135 individual lipids<br><br>(↑) dihydroceramide, ceramide, phosphatidylethanolamine, phosphatidylinositol, phosphatidylglycerol, free cholesterol, cholesterol ester, diacylglycerol, triacylglycerol<br><br>(↓) Trihexosylceramide, alkylphosphatidylcholine |
|                                            | <b>Replication:</b> San Antonio Family Heart Study (SAFHS) – USA       | Cohort, population-based study | 1076 (808 normoglycemics, 126 prediabetic and 142 T2D) | LC/MS-MS<br>Targeted (65 diacylglycerol and triacylglycerol species and 194 other lipid species) | Plasma | Prediabetes (OGTT) | <b>Lipids</b><br>Significant associations with 104 individual lipids<br><br>(↑) dihydroceramide, ceramide, phosphatidylethanolamine, phosphatidylinositol, phosphatidylglycerol, cholesterol ester, diacylglycerol, triacylglycerol<br><br>(↓) Trihexosylceramide                                             |

SUPPLEMENTARY DATA

|                                                      |                                                              |              |                                                          |                                                                            |       |                       |                                                                                                                                                                                                                                                               |
|------------------------------------------------------|--------------------------------------------------------------|--------------|----------------------------------------------------------|----------------------------------------------------------------------------|-------|-----------------------|---------------------------------------------------------------------------------------------------------------------------------------------------------------------------------------------------------------------------------------------------------------|
|                                                      |                                                              |              |                                                          |                                                                            |       | T2D                   | <b>Lipids</b><br>Significant associations with 121 individual lipids<br>(↑) dihydroceramide, ceramide, phosphatidylethanolamine, phosphatidylinositol, phosphatidylglycerol, cholesterol ester, diacylglycerol, triacylglycerol                               |
| Zhang <i>et al.</i> 2014– <i>J Physiol Biochem</i>   | Hospital of Heilongjiang – China                             | Case-control | 123 (42 nondiabetic/81 T2D)                              | UPLC-QTOF-HDMS<br>Untargeted (>9000 metabolite features)                   | Urine | T2D                   | <b>Acylcarnitines, sugar metabolites, amino acids</b><br>(↑) Acylcarnitines, 3-indoxylsulfate, glucose, glycine<br>(↓) citric acid, kynurenic acid, ureic acid, glucuronolactone, lysine, phosphate                                                           |
| Thalacker-Mercer <i>et al.</i> 2014– <i>Diabetes</i> | University of Alabama – USA                                  | Case-control | 124 (61 insulin sensitives/32 insulin resistants/31 T2D) | Flow injection MS<br>Targeted (16 amino acids)                             | Serum | Prediabetes (HOMA-IR) | <b>Amino acids, BCAAs</b><br>(↓) glycine, serine, and citrulline<br>(↑) glutamine/glutamate                                                                                                                                                                   |
|                                                      |                                                              |              |                                                          |                                                                            |       | T2D                   | (↑) leucine/isoleucine, valine, glutamine/glutamate, aspartate/asparagine<br>(↓) glycine, histidine                                                                                                                                                           |
| Geidenstam <i>et al.</i> 2014– <i>Obesity</i>        | Endocrinology Department, Skane University Hospital – Sweden | Case-control | 20 (14 nondiabetic obese/6 lean controls)                | GC/MS<br>Targeted (59 metabolites, amino acids, lipids, sugar metabolites) | Serum | Prediabetes (OGTT)    | <b>Lipids, BCAAs, sugar metabolites</b><br>(↑) BCAAs, asparagine, glutamate, tyrosine, taurine, pyrophosphate, threonic acid, phenylalanine, serine, glyceric acid, aspartate<br>(↓) palmitic acid, lauric acid, oleic acid, pentadecanoic acid, stearic acid |

(↑) positive association, or (↓) inverse association with prediabetes traits or type 2 diabetes. Abbreviations: BCAA, branched-chain amino acid; BCKA, branched-chain keto acid; EFA, esterified fatty acid; GC, gas chromatography; GC-SIM-MS, gas chromatography with single ion monitoring mass spectrometry; GC x GC-TOFMS, two-dimensional gas chromatography/time-of-flight mass spectrometry; IFG, impaired fasting glucose; ISI, insulin sensitivity index; HOMA, homeostasis model assessment; HPLC-ESI-MS, high-performance liquid chromatography-electrospray ionization-mass spectrometry; LC, liquid chromatography; LPC, lysophosphatidylcholine; MS, mass spectrometry; MUFA, monounsaturated fatty acids; N, number; NEFA, non-sterified fatty acids; NMR, nuclear magnetic resonance; OGTT, oral glucose tolerance test; PC, phosphatidylcholine; PE, phosphethanolamine; SFA, saturated fatty acids; SM, sphingomyelin; T2D, type 2 diabetes; UHPLC, ultra-high performance liquid chromatography; UPLC-MS, ultra-performance liquid chromatography coupled with mass spectrometry.

SUPPLEMENTARY DATA

**Supplementary Table 2. Description of data included in the meta-analysis.**

| Metabolite        | Author - year-<br>journal                               | Study                                                                    | Participants                   | Covariates                                                                                                                                                                | Amino acid concentration                                                     | HR/RR/OR (CI) per<br>SD |
|-------------------|---------------------------------------------------------|--------------------------------------------------------------------------|--------------------------------|---------------------------------------------------------------------------------------------------------------------------------------------------------------------------|------------------------------------------------------------------------------|-------------------------|
| <b>Isoleucine</b> |                                                         |                                                                          |                                |                                                                                                                                                                           |                                                                              |                         |
| 1                 | Wang <i>et al.</i> 2011-<br><i>Nat Med</i>              | Framingham<br>Heart Study<br>(FHS) –<br>discovery sample                 | 189 cases/189<br>controls      | Age, sex, BMI, fasting glucose                                                                                                                                            | 145.1 (123.4, 165.8) $\mu\text{m}$<br>[median (IQ)]                          | 1.70 (1.27-2.28)        |
| 2                 | Wang <i>et al.</i> 2011-<br><i>Nat Med</i>              | Malmö Diet and<br>Cancer Study<br>(MDC) –<br>replication<br>sample       | 163 cases/163<br>controls      | Age, sex, BMI, fasting glucose                                                                                                                                            | NR                                                                           | 1.37 (0.95-1.96)        |
| 3                 | Wang-Sattler <i>et al.</i><br>2012- <i>Mol Sys Biol</i> | KORA S4                                                                  | 91 cases/91<br>controls        | Age, sex, BMI, physical activity, alcohol<br>intake, smoking, systolic BP, HDL<br>cholesterol, HbA1c and fasting glucose and<br>insulin                                   | 72.65 (19.67) $\mu\text{m}$ [mean<br>(SD)]                                   | 1.73 (1.15-2.60)        |
| 4                 | Floegel <i>et al.</i> 2013-<br><i>Diabetes</i>          | EPIC-Potsdam                                                             | 800 cases/ 2282<br>nondiabetic | Age, sex, alcohol intake, smoking, physical<br>activity, coffee intake, red meat intake,<br>whole-grain bread intake, prevalent<br>hypertension, BMI, waist circumference | 211 (63.3) $\mu\text{m}$ [mean (SD)]                                         | 1.30 (1.17-1.43)        |
| 5                 | Tillin <i>et al.</i> 2015-<br><i>Diabetes</i>           | Southall And<br>Brent Revisited<br>Study (SABRE) –<br>European men       | 113 cases/688<br>nondiabetic   | Age, sex, BMI, fasting glucose                                                                                                                                            | 0.058 (0.050, 0.066) $\mu\text{m}$<br>[median (IQ)]                          | 1.21 (0.97-1.51)        |
|                   | Tillin <i>et al.</i> 2015-<br><i>Diabetes</i>           | Southall And<br>Brent Revisited<br>Study (SABRE)<br>– South Asian<br>men | 227 cases/780<br>nondiabetic   | Age, sex, BMI, fasting glucose                                                                                                                                            | 0.060 (0.052, 0.068) $\mu\text{m}$<br>[median (IQ)]                          | 1.42 (1.16-1.75)        |
| 7                 | Stancáková <i>et al.</i><br>2012- <i>Diabetes</i>       | Metabolic<br>Syndrome in Men<br>(METSIM)                                 | 151 cases/375<br>nondiabetic   | Unadjusted, adjusted means NR                                                                                                                                             | Cases: 17.95 (4.42); Non-<br>cases: 17.25 (4.1) $\mu\text{m}$<br>[means(SD)] | 1.34 (1.18-1.53)*       |
| 8                 | Ferrannini <i>et al.</i><br>2013- <i>Diabetes</i>       | Botnia<br>Prospective Study                                              | 130 cases/ 412<br>nondiabetic  | Unadjusted, adjusted means NR                                                                                                                                             | Cases: 72 (23); Non-cases: 69<br>(20), $\mu\text{m}$ median [IQR]            | 1.29 (1.08-1.56)*       |
| <b>Leucine</b>    |                                                         |                                                                          |                                |                                                                                                                                                                           |                                                                              |                         |

SUPPLEMENTARY DATA

|               |                                                         |                          |                             |                                                                                                                                                                  |                                                                   |                   |
|---------------|---------------------------------------------------------|--------------------------|-----------------------------|------------------------------------------------------------------------------------------------------------------------------------------------------------------|-------------------------------------------------------------------|-------------------|
| <b>1</b>      | Wang <i>et al.</i> 2011–<br><i>Nat Med</i>              | FHS – discovery sample   | 189 cases/189 controls      | Age, sex, BMI, fasting glucose                                                                                                                                   | 85.1 (72.3, 102.5) $\mu\text{m}$ [median (IQ)]                    | 1.62 (1.20-2.17)  |
| <b>2</b>      | Wang <i>et al.</i> 2011–<br><i>Nat Med</i>              | MDC – replication sample | 163 cases/163 controls      | Age, sex, BMI, fasting glucose                                                                                                                                   | NR                                                                | 1.60 (1.13-2.27)  |
| <b>3</b>      | Wang-Sattler <i>et al.</i> 2012–<br><i>Mol Sys Biol</i> | KORA S4                  | 91 cases/91 controls        | Age, sex, BMI, physical activity, alcohol intake, smoking, systolic BP, HDL cholesterol, HbA1c and fasting glucose and insulin                                   | 160.26 (43.19) $\mu\text{m}$ [mean (SD)]                          | 1.43 (0.98-2.08)  |
| <b>4</b>      | Tillin <i>et al.</i> 2015–<br><i>Diabetes</i>           | SABRE – European men     | 113 cases/688 nondiabetic   | Age, sex, BMI, fasting glucose                                                                                                                                   | 0.092 (0.081,0.11) $\mu\text{m}$ [median (IQ)]                    | 1.11 (0.92-1.35)  |
| <b>5</b>      | Tillin <i>et al.</i> 2015–<br><i>Diabetes</i>           | SABRE – South Asian men  | 780 nondiabetics/227 TD2    | Age, sex, BMI, fasting glucose                                                                                                                                   | 0.092 (0.083, 0.10) $\mu\text{m}$ [median (IQ)]                   | 1.36 (1.11-1.68)  |
| <b>6</b>      | Stancáková <i>et al.</i> 2012–<br><i>Diabetes</i>       | METSIM                   | 151 cases/375 nondiabetics  | Unadjusted, adjusted means NR                                                                                                                                    | Cases: 29.57 (6.86); Non-cases: 28.54 (6.04), [means(SD)]         | 1.33 (1.17-1.51)* |
| <b>7</b>      | Ferrannini <i>et al.</i> 2013–<br><i>Diabetes</i>       | Botnia Prospective Study | 412 nondiabetic/130 T2D     | Unadjusted, adjusted means NR                                                                                                                                    | Cases: 145 (51); Non-cases: 134 (39), $\mu\text{m}$ [median (IQ)] | 1.60 (1.33-1.93)* |
| <b>Valine</b> |                                                         |                          |                             |                                                                                                                                                                  |                                                                   |                   |
| <b>1</b>      | Wang <i>et al.</i> 2011–<br><i>Nat Med</i>              | FHS – discovery sample   | 189 cases/189 controls      | Age, sex, BMI, fasting glucose                                                                                                                                   | 191.4 (172.2, 213.0) $\mu\text{m}$ [median (IQ)]                  | 1.57 (1.17-2.09)  |
| <b>2</b>      | Wang <i>et al.</i> 2011–<br><i>Nat Med</i>              | MDC – replication sample | 163 cases/163 controls      | Age, sex, BMI, fasting glucose                                                                                                                                   | NR                                                                | 2.01 (1.18-3.42)  |
| <b>3</b>      | Wang-Sattler <i>et al.</i> 2012–<br><i>Mol Sys Biol</i> | KORA S4                  | 91 cases/91 controls        | Age, sex, BMI, physical activity, alcohol intake, smoking, systolic BP, HDL cholesterol, HbA1c and fasting glucose and insulin                                   | 228.02 (51.89) $\mu\text{m}$ [mean (SD)]                          | 1.48 (1.03-2.13)  |
| <b>4</b>      | Floegel <i>et al.</i> 201 –<br><i>Diabetes</i>          | EPIC-Potsdam             | 800 cases/ 2282 nondiabetic | Age, sex, alcohol intake, smoking, physical activity, coffee intake, red meat intake, whole-grain bread intake, prevalent hypertension, BMI, waist circumference | 294 (74.5) $\mu\text{m}$ [mean (SD)]                              | 1.27 (1.16-1.40)  |

SUPPLEMENTARY DATA

|                 |                                                      |                                                    |                            |                                                                                                                                                                  |                                                                          |                   |
|-----------------|------------------------------------------------------|----------------------------------------------------|----------------------------|------------------------------------------------------------------------------------------------------------------------------------------------------------------|--------------------------------------------------------------------------|-------------------|
| 5               | Palmer <i>et al.</i> 2014– <i>JCEM</i>               | Insulin Resistance in Atherosclerosis Study (IRAS) | 76 cases/ 70 nondiabetic   | Age, sex, BMI, ethnicity, insulin sensitivity                                                                                                                    | Cases: 232 (36); Non-cases: 201 (36) $\mu\text{m}$ [mean (SD)]           | 1.77 (1.15-2.74)  |
| 6               | Tillin <i>et al.</i> 2015– <i>Diabetes</i>           | SABRE – European men                               | 113 cases/688 nondiabetic  | Age, sex, BMI, fasting glucose                                                                                                                                   | 0.180 (0.158, 0.504) $\mu\text{m}$ [median (IQ)]                         | 1.04 (0.84-1.29)  |
| 7               | Tillin <i>et al.</i> 2015– <i>Diabetes</i>           | SABRE – South Asian men                            | 227 cases/780 nondiabetics | Age, sex, BMI, fasting glucose                                                                                                                                   | 0.176 (0.155, 0.198) $\mu\text{m}$ [median (IQ)]                         | 1.32 (1.08-1.62)  |
| 8               | Stancáková <i>et al.</i> 2012– <i>Diabetes</i>       | METSIM                                             | 151 cases/375 nondiabetic  | Unadjusted, adjusted means NR                                                                                                                                    | Cases: 67.16 (11.06); Non-cases: 65.61 (11.49) $\mu\text{m}$ [means(SD)] | 1.28 (1.13-1.46)* |
| 9               | Ferrannini <i>et al.</i> 2013– <i>Diabetes</i>       | Botnia Prospective Study                           | 130 cases/412 nondiabetic  | Unadjusted, adjusted means NR                                                                                                                                    | Cases: 217 (69); Non-cases: 209 (50), $\mu\text{m}$ [median (IQ)]        | 1.30 (1.08-1.56)* |
| <b>Tyrosine</b> |                                                      |                                                    |                            |                                                                                                                                                                  |                                                                          |                   |
| 1               | Wang <i>et al.</i> 2011– <i>Nat Med</i>              | FHS – discovery sample                             | 189 cases/189 controls     | Age, sex, BMI, fasting glucose                                                                                                                                   | NR                                                                       | 1.85 (1.35-2.55)  |
| 2               | Wang <i>et al.</i> 2011– <i>Nat Med</i>              | MDC – replication sample                           | 163 cases/163 controls     | Age, sex, BMI, fasting glucose                                                                                                                                   | NR                                                                       | 1.41 (1.05-1.91)  |
| 3               | Wang-Sattler <i>et al.</i> 2012– <i>Mol Sys Biol</i> | KORA S4                                            | 91 cases/91 controls       | Age, sex, BMI, physical activity, alcohol intake, smoking, systolic BP, HDL cholesterol, HbA1c and fasting glucose and insulin                                   | 72.51 (20.2) $\mu\text{m}$ [mean (SD)]                                   | 1.52 (1.03-2.24)  |
| 4               | Floegel <i>et al.</i> 2013– <i>Diabetes</i>          | EPIC-Potsdam                                       | 800 cases/2282 nondiabetic | Age, sex, alcohol intake, smoking, physical activity, coffee intake, red meat intake, whole-grain bread intake, prevalent hypertension, BMI, waist circumference | 81.5 (22.7) [mean (SD)]                                                  | 1.31 (1.18-1.45)  |
| 5               | Palmer <i>et al.</i> 2014– <i>JCEM</i>               | IRAS                                               | 76 cases/70 nondiabetic    | Age, sex, BMI, ethnicity, insulin sensitivity                                                                                                                    | Cases: 78 (17); Non-cases: 72 (17) $\mu\text{m}$ [median (IQ)]           | 0.93 (0.61-1.41)  |
| 6               | Tillin <i>et al.</i> 2015– <i>Diabetes</i>           | SABRE – European men                               | 113 cases/688 nondiabetic  | Age, sex, BMI, fasting glucose                                                                                                                                   | 0.054 (0.048, 0.061) $\mu\text{m}$ [median (IQ)]                         | 1.11 (0.90-1.39)  |

SUPPLEMENTARY DATA

|                      |                                                         |                          |                            |                                                                                                                                                                                                                               |                                                                        |                   |
|----------------------|---------------------------------------------------------|--------------------------|----------------------------|-------------------------------------------------------------------------------------------------------------------------------------------------------------------------------------------------------------------------------|------------------------------------------------------------------------|-------------------|
| 7                    | Tillin <i>et al.</i> 2015–<br><i>Diabetes</i>           | SABRE – South Asian men  | 227cases/780 nondiabetic   | Age, sex, BMI, fasting glucose                                                                                                                                                                                                | 0.059 (0.052, 0.067) $\mu\text{m}$ [median (IQ)]                       | 1.56 (1.26-1.93)  |
| 8                    | Stancáková <i>et al.</i> 2012–<br><i>Diabetes</i>       | METSIM                   | 151 cases/375 nondiabetic  | Unadjusted, adjusted means NR                                                                                                                                                                                                 | Cases: 17.4 (3.04); Non-cases: 17.11 (2.94), $\mu\text{m}$ [means(SD)] | 1.19 (1.05-1.35)* |
| 9                    | Ferrannini <i>et al.</i> 2013–<br><i>Diabetes</i>       | Botnia Prospective Study | 130 cases/412 nondiabetic  | Unadjusted, adjusted means NR                                                                                                                                                                                                 | Cases: 61 (12); Non-cases: 57 (15), $\mu\text{m}$ [median (IQ)]        | 1.65 (1.37-1.99)* |
| <b>Phenylalanine</b> |                                                         |                          |                            |                                                                                                                                                                                                                               |                                                                        |                   |
| 1                    | Wang <i>et al.</i> 2011–<br><i>Nat Med</i>              | FHS – discovery sample   | 189 cases/189 controls     | Age, sex, BMI, fasting glucose                                                                                                                                                                                                | 62.0 (57.0, 67.9) $\mu\text{m}$ [median (IQ)]                          | 2.02 (1.40-2.92)  |
| 2                    | Wang <i>et al.</i> 2011–<br><i>Nat Med</i>              | MDC – replication sample | 163 cases/163 controls     | Age, sex, BMI, fasting glucose                                                                                                                                                                                                | NR                                                                     | 1.37 (1.01-1.84)  |
| 3                    | Wang-Sattler <i>et al.</i> 2012–<br><i>Mol Sys Biol</i> | KORA S4                  | 91 cases/91 controls       | Age, sex, BMI, physical activity, alcohol intake, smoking, systolic BP, HDL cholesterol, HbA <sub>1c</sub> and fasting glucose and insulin                                                                                    | 77.51 (17.62) $\mu\text{m}$ [means(SD)]                                | 1.21 (0.88-1.67)  |
| 4                    | Floegel <i>et al.</i> 2013–<br><i>Diabetes</i>          | EPIC-Potsdam             | 800 cases/2282 nondiabetic | Age, sex, alcohol intake, smoking, physical activity, coffee intake, red meat intake, whole-grain bread intake, prevalent hypertension, BMI, waist circumference, glucose, HbA <sub>1c</sub> , HDL cholesterol, triglycerides | 56.4 (12.0) $\mu\text{m}$ [means(SD)]                                  | 1.25 (1.12-1.39)  |
| 5                    | Palmer <i>et al.</i> 2014–<br><i>JCEM</i>               | IRAS                     | 76 cases/70 nondiabetic    | Age, sex, BMI, ethnicity, insulin sensitivity                                                                                                                                                                                 | Cases: 72 (12); Non-cases: 67 (13) $\mu\text{m}$ [means(SD)]           | 1.14 (0.71-1.85)  |
| 6                    | Tillin <i>et al.</i> 2015–<br><i>Diabetes</i>           | SABRE – European men     | 113 cases/688 nondiabetic  | Age, sex, BMI, fasting glucose                                                                                                                                                                                                | 0.092 (0.084, 0.10) $\mu\text{m}$ [median (IQ)]                        | 0.97 (0.80-1.18)  |
| 7                    | Tillin <i>et al.</i> 201 –<br><i>Diabetes</i>           | SABRE – South Asian men  | 227 cases/780 nondiabetic  | Age, sex, BMI, fasting glucose                                                                                                                                                                                                | 0.094 (0.085,0.10) $\mu\text{m}$ [median (IQ)]                         | 1.29 (1.06-1.57)  |
| 8                    | Stancáková <i>et al.</i> 2012–<br><i>Diabetes</i>       | METSIM                   | 151 cases/375 nondiabetic  | Unadjusted, adjusted means NR                                                                                                                                                                                                 | Cases: 23.32 (3.05); Non-cases: 23.18 (3.33) $\mu\text{m}$ [means(SD)] | 1.08 (0.95-1.23)* |
| 9                    | Ferrannini <i>et al.</i> 2013–<br><i>Diabetes</i>       | Botnia Prospective Study | 130 cases/412 nondiabetic  | Unadjusted, adjusted means NR                                                                                                                                                                                                 | Cases: 55 (15); Non-cases: 55 (11) $\mu\text{m}$ [median (IQ)]         | 1.00 (0.83-1.19)* |

SUPPLEMENTARY DATA

| <b>Isoleucine, phenylalanine, tyrosine</b> |                                                         |                          |                            |                                                                                                                                                                                                                               |                                                                 |                  |
|--------------------------------------------|---------------------------------------------------------|--------------------------|----------------------------|-------------------------------------------------------------------------------------------------------------------------------------------------------------------------------------------------------------------------------|-----------------------------------------------------------------|------------------|
| <b>1</b>                                   | Wang <i>et al.</i> 2011–<br><i>Nat Med</i>              | FHS – discovery sample   | 189 cases/189 controls     | Age, sex, BMI, fasting glucose                                                                                                                                                                                                | NR                                                              | 2.42 (1.66-3.54) |
| <b>2</b>                                   | Wang <i>et al.</i> 2011–<br><i>Nat Med</i>              | MDC – replication sample | 163 cases/163 controls     | Age, sex, BMI, fasting glucose                                                                                                                                                                                                | NR                                                              | 1.52 (1.10-2.11) |
| <b>3</b>                                   | Wang <i>et al.</i> 2011–<br><i>Nat Med</i>              | FHS – random subcohort   | 201 cases /400 controls    | Age, sex, BMI, fasting glucose                                                                                                                                                                                                | NR                                                              | 1.33 (1.08-1.63) |
| <b>4</b>                                   | Tillin <i>et al.</i> 2015–<br><i>Diabetes</i>           | SABRE – European men     | 113 cases/688 nondiabetic  | Age, sex, BMI, fasting glucose                                                                                                                                                                                                | 0.205 (0.186, 0.228) $\mu\text{m}$ [median (IQ)]                | 1.02 (0.81-1.27) |
| <b>5</b>                                   | Tillin <i>et al.</i> 2015–<br><i>Diabetes</i>           | SABRE – South Asian men  | 227 cases/780 nondiabetic  | Age, sex, BMI, fasting glucose                                                                                                                                                                                                | 0.213 (0.197, 0.233) $\mu\text{m}$ [median (IQ)]                | 1.39 (1.10-1.75) |
| <b>Glycine</b>                             |                                                         |                          |                            |                                                                                                                                                                                                                               |                                                                 |                  |
| <b>1</b>                                   | Wang-Sattler <i>et al.</i> 2012–<br><i>Mol Sys Biol</i> | KORA S4                  | 91 cases/91 controls       | Age, sex, BMI, physical activity, alcohol intake, smoking, systolic BP, HDL cholesterol, HbA1c and fasting glucose and insulin                                                                                                | 263.02 (74.35) $\mu\text{m}$ [means (SD)]                       | 1.03 (0.74-1.44) |
| <b>2</b>                                   | Wang-Sattler <i>et al.</i> 2012–<br><i>Mol Sys Biol</i> | KORA                     | 91 cases/876 nondiabetic   | Age, sex, BMI, physical activity, alcohol intake, smoking, systolic BP, HDL cholesterol, HbA1c and fasting glucose and fasting insulin                                                                                        | NR                                                              | 0.85 (0.62-1.14) |
| <b>3</b>                                   | Floegel <i>et al.</i> 2013–<br><i>Diabetes</i>          | EPIC-Potsdam             | 800 cases/2282 nondiabetic | Age, sex, alcohol intake, smoking, physical activity, coffee intake, red meat intake, whole-grain bread intake, prevalent hypertension, BMI, waist circumference, glucose, HbA <sub>1c</sub> , HDL cholesterol, triglycerides | 256 (77.2) $\mu\text{m}$ [means (SD)]                           | 0.89 (0.78-1.01) |
| <b>4</b>                                   | Palmer <i>et al.</i> 2014–<br><i>JCEM</i>               | IRAS                     | 76 cases/70 nondiabetic    | Age, sex, BMI, ethnicity, insulin sensitivity                                                                                                                                                                                 | Cases: 204 (45); Non-cases: 238 (71) $\mu\text{m}$ [means (SD)] | 0.80 (0.52-1.25) |
| <b>5</b>                                   | Tillin <i>et al.</i> 2015–<br><i>Diabetes</i>           | SABRE – European men     | 113 cases/688 nondiabetic  | Age, sex, BMI, fasting glucose                                                                                                                                                                                                | 0.287 (0.262, 0.316) $\mu\text{m}$ [median (IQ)]                | 0.78 (0.64-0.96) |
| <b>6</b>                                   | Tillin <i>et al.</i> 2015 –                             | SABRE – South            | 227 cases/780              | Age, sex, BMI, fasting glucose                                                                                                                                                                                                | 0.282 (0.257, 0.312) $\mu\text{m}$                              | 0.96 (0.80-1.15) |

SUPPLEMENTARY DATA

|                  |                                                |                          |                            |                                                                                                                                                                                 |                                                                           |                    |
|------------------|------------------------------------------------|--------------------------|----------------------------|---------------------------------------------------------------------------------------------------------------------------------------------------------------------------------|---------------------------------------------------------------------------|--------------------|
|                  | <i>Diabetes</i>                                | Asian men                | nondiabetic                |                                                                                                                                                                                 | [median (IQ)]                                                             |                    |
| 7                | Ferrannini <i>et al.</i> 2013– <i>Diabetes</i> | Botnia Prospective Study | 130 cases/412 nondiabetic  | Unadjusted, adjusted means NR                                                                                                                                                   | Cases: 174 (60); Non-cases: 184 (61) $\mu\text{m}$ [median (IQ)]          | 0.74 (0.62-0.89)*  |
| <b>Glutamine</b> |                                                |                          |                            |                                                                                                                                                                                 |                                                                           |                    |
| 1                | Cheng <i>et al.</i> 2012– <i>Circulation</i>   | FHS                      | 601 non diabetic/T2D NR    | Age, sex, BMI, fasting glucose                                                                                                                                                  | NR                                                                        | 0.83 (0.68-1.02)   |
| 2                | Cheng <i>et al.</i> 2012– <i>Circulation</i>   | MDC                      | 409 non diabetic/T2D NR    | Age, sex, BMI, fasting glucose                                                                                                                                                  | NR                                                                        | 0.81 (0.67-0.99)   |
| 3                | Tillin <i>et al.</i> 2015– <i>Diabetes</i>     | SABRE – European men     | 113 cases/688 nondiabetic  | Age, sex, BMI, fasting glucose                                                                                                                                                  | 0.385 (0.262, 0.450) $\mu\text{m}$ [median (IQ)]                          | 0.94 (0.77-1.15)   |
| 4                | Tillin <i>et al.</i> 2015– <i>Diabetes</i>     | SABRE – South Asian men  | 227 cases/780 nondiabetic  | Age, sex, BMI, fasting glucose                                                                                                                                                  | 0.415 (0.317, 0.473) $\mu\text{m}$ [median (IQ)]                          | 0.88 (0.73-1.05)   |
| 5                | Floegel <i>et al.</i> 2013– <i>Diabetes</i>    | EPIC-Potsdam             | 800 cases/2282 nondiabetic | Age, sex, alcohol intake, smoking, physical activity, education, coffee intake, red meat intake, whole grain bread intake, prevalent hypertension, BMI, and waist circumference | 584 (94.5) $\mu\text{m}$ [means (SD)]                                     | 0.85 (0.81-0.89)** |
| 6                | Stancáková <i>et al.</i> 2012– <i>Diabetes</i> | METSIM                   | 151 cases/375 nondiabetic  | Unadjusted, adjusted means NR                                                                                                                                                   | Cases: 155.55 (18.07); Non-cases 159.6 (20.77) $\mu\text{m}$ [means (SD)] | 0.68 (0.60-0.77)*  |
| 7                | Ferrannini <i>et al.</i> 2013– <i>Diabetes</i> | Botnia Prospective Study | 130 cases/412 nondiabetic  | Unadjusted, adjusted means NR                                                                                                                                                   | Cases: 11 (11); Non-cases: 15 (20), $\mu\text{m}$ [median (IQ)]           | 0.67 (0.56-0.80)*  |
| <b>Alanine</b>   |                                                |                          |                            |                                                                                                                                                                                 |                                                                           |                    |
| 1                | Palmer <i>et al.</i> 2014– <i>JCEM</i>         | IRAS                     | 76 cases/70 nondiabetic    | Age, sex, BMI, ethnicity, insulin sensitivity                                                                                                                                   | Cases: 405 (91); Non-cases: 359 (78) $\mu\text{m}$ [means (SD)]           | 1.49 (0.97-2.30)   |
| 2                | Tillin <i>et al.</i> 2015– <i>Diabetes</i>     | SABRE – European men     | 113 cases/688 nondiabetic  | Age, sex, BMI, fasting glucose                                                                                                                                                  | 0.328 (0.290, 0.367) $\mu\text{m}$ [median (IQ)]                          | 1.03 (0.84-1.28)   |
| 3                | Tillin <i>et al.</i> 201 –                     | SABRE – South            | 227 cases/ 780             | Age, sex, BMI, fasting glucose                                                                                                                                                  | 0.335 (0.302, 0.374) $\mu\text{m}$                                        | 1.25 (1.03-1.51)   |



SUPPLEMENTARY DATA

|                  |                                                |                          |                             |                                                                                                                                                                                 |                                                                            |                    |
|------------------|------------------------------------------------|--------------------------|-----------------------------|---------------------------------------------------------------------------------------------------------------------------------------------------------------------------------|----------------------------------------------------------------------------|--------------------|
|                  | <i>Diabetes</i>                                | Asian men                | nondiabetic                 |                                                                                                                                                                                 | [median (IQ)]                                                              |                    |
| <b>4</b>         | Stancáková <i>et al.</i> 2012– <i>Diabetes</i> | METSIM                   | 151 cases/375 nondiabetic   | Unadjusted, adjusted means NR                                                                                                                                                   | Cases: 127.87 (18.1); Non-cases: 125.09 (15.96) $\mu\text{m}$ [means (SD)] | 1.34 (1.18-1.52)*  |
| <b>5</b>         | Ferrannini <i>et al.</i> 2013– <i>Diabetes</i> | Botnia Prospective Study | 130 cases/412 nondiabetic   | Unadjusted, adjusted means NR                                                                                                                                                   | Cases: 371 (128); Non-cases: 350 (123) $\mu\text{m}$ [median (IQ)]         | 1.35 (1.13-1.63)*  |
| <b>Histidine</b> |                                                |                          |                             |                                                                                                                                                                                 |                                                                            |                    |
| <b>1</b>         | Palmer <i>et al.</i> 2014– <i>JCEM</i>         | IRAS                     | 76 cases/ 70 nondiabetic    | Age, sex, BMI, ethnicity, insulin sensitivity                                                                                                                                   | Cases: 73 (14) ; Non-cases: 77 (13) $\mu\text{m}$ [means (SD)]             | 0.81 (0.56-1.18)   |
| <b>2</b>         | Tillin <i>et al.</i> 2015– <i>Diabetes</i>     | SABRE – European men     | 113 cases/ 688 nondiabetics | Age, sex, BMI, fasting glucose                                                                                                                                                  | 0.077 (0.068, 0.088) $\mu\text{M}$ [median (IQ)]                           | 0.92 (0.75-1.12)   |
| <b>3</b>         | Tillin <i>et al.</i> 2015 – <i>Diabetes</i>    | SABRE – South Asian men  | 227 cases/780 nondiabetic   | Age, sex, BMI, fasting glucose                                                                                                                                                  | 0.078 (0.070, 0.090) $\mu\text{M}$ [median (IQ)]                           | 1.13 (0.93-1.38)   |
| <b>4</b>         | Floegel <i>et al.</i> 2013– <i>Diabetes</i>    | EPIC-Potsdam             | 800 cases/2282 nondiabetic  | Age, sex, alcohol intake, smoking, physical activity, education, coffee intake, red meat intake, whole grain bread intake. prevalent hypertension, BMI, and waist circumference | 93.4 (16.6) $\mu\text{m}$ [means (SD)]                                     | 0.98 (0.92-1.04)** |
| <b>5</b>         | Stancáková <i>et al.</i> 2012– <i>Diabetes</i> | METSIM                   | 151 cases/375 nondiabetic   | Unadjusted, adjusted means NR                                                                                                                                                   | Cases: 19.66 (2.48); Non-cases: 19.70 (2.65) $\mu\text{m}$ [means (SD)]    | 0.97 (0.85-1.10)*  |
| <b>6</b>         | Ferrannini <i>et al.</i> 2013– <i>Diabetes</i> | Botnia Prospective Study | 130 cases/412 nondiabetic   | Unadjusted, adjusted means NR                                                                                                                                                   | Cases: 41 (13); Non-cases: 43 (10) [median (IQR)]                          | 0.71 (0.59-0.85)*  |
| <b>Arginine</b>  |                                                |                          |                             |                                                                                                                                                                                 |                                                                            |                    |
| <b>1</b>         | Palmer <i>et al.</i> 2014– <i>JCEM</i>         | IRAS                     | 76 cases/ nondiabetic       | Age, sex, BMI, ethnicity, insulin sensitivity                                                                                                                                   | Cases: 86 (18); Non-cases: 80 (17) $\mu\text{m}$ [means (SD)]              | 1.33 (0.90-1.98)   |
| <b>2</b>         | Ferrannini <i>et al.</i> 2013– <i>Diabetes</i> | Botnia Prospective Study | 130 cases/412 nondiabetic   | Unadjusted, adjusted means NR                                                                                                                                                   | Cases: 71 (23); Non-cases: 67 (24), $\mu\text{m}$ [median (IQR)]           | 1.35 (1.13-1.63)*  |

SUPPLEMENTARY DATA

|                   |                                                   |                          |                               |                                                                                                                                                                                 |                                                                      |                    |
|-------------------|---------------------------------------------------|--------------------------|-------------------------------|---------------------------------------------------------------------------------------------------------------------------------------------------------------------------------|----------------------------------------------------------------------|--------------------|
| <b>3</b>          | Floegel <i>et al.</i> 2013–<br><i>Diabetes</i>    | EPIC-Potsdam             | 800 cases/2282<br>nondiabetic | Age, sex, alcohol intake, smoking, physical activity, education, coffee intake, red meat intake, whole grain bread intake. prevalent hypertension, BMI, and waist circumference | 106 (23) $\mu\text{m}$ [means (SD)]                                  | 1.18 (1.12-1.24)** |
| <b>Ornithine</b>  |                                                   |                          |                               |                                                                                                                                                                                 |                                                                      |                    |
| <b>1</b>          | Palmer <i>et al.</i> 2014–<br><i>JCEM</i>         | IRAS                     | 76 cases/<br>nondiabetic      | Age, sex, BMI, ethnicity, insulin sensitivity                                                                                                                                   | Cases: 58 (15); Non-cases: 54 (14) $\mu\text{m}$ [means (SD)]        | 1.19 (0.83-1.74)   |
| <b>2</b>          | Ferrannini <i>et al.</i> 2013–<br><i>Diabetes</i> | Botnia Prospective Study | 130 cases/412<br>nondiabetic  | Unadjusted, adjusted means NR                                                                                                                                                   | Cases: 59 (23); Non-cases: 61 (14) $\mu\text{m}$ [median (IQR)]      | 0.80 (0.67-0.96)*  |
| <b>3</b>          | Floegel <i>et al.</i> 2013–<br><i>Diabetes</i>    | EPIC-Potsdam             | 800 cases/2282<br>nondiabetic | Age, sex, alcohol intake, smoking, physical activity, education, coffee intake, red meat intake, whole grain bread intake. prevalent hypertension, BMI, and waist circumference | 100 (27.2) $\mu\text{m}$ [means (SD)]                                | 1.12 (1.07-1.18)** |
| <b>Serine</b>     |                                                   |                          |                               |                                                                                                                                                                                 |                                                                      |                    |
| <b>1</b>          | Palmer <i>et al.</i> 2014–<br><i>JCEM</i>         | IRAS                     | 76 cases/<br>nondiabetic      | Age, sex, BMI, ethnicity, insulin sensitivity                                                                                                                                   | Cases: 92 (20); Non-cases: 98 (20) $\mu\text{m}$ [means (SD)]        | 0.91 (0.58-1.44)*  |
| <b>2</b>          | Ferrannini <i>et al.</i> 2013–<br><i>Diabetes</i> | Botnia Prospective Study | 130 cases/412<br>nondiabetic  | Unadjusted, adjusted means NR                                                                                                                                                   | Cases: 99 (14); Non-cases: 100 (14) $\mu\text{m}$ [median (IQR)]     | 0.88 (0.73-1.05)*  |
| <b>3</b>          | Floegel <i>et al.</i> 2013–<br><i>Diabetes</i>    | EPIC-Potsdam             | 800 cases/2282<br>nondiabetic | Age, sex, alcohol intake, smoking, physical activity, education, coffee intake, red meat intake, whole grain bread intake. prevalent hypertension, BMI, and waist circumference | 115 (28.4) $\mu\text{m}$ [means (SD)]                                | 0.98 (0.92-1.04)** |
| <b>Methionine</b> |                                                   |                          |                               |                                                                                                                                                                                 |                                                                      |                    |
| <b>1</b>          | Palmer <i>et al.</i> 2014–<br><i>JCEM</i>         | IRAS                     | 76 cases/<br>nondiabetic      | Age, sex, BMI, ethnicity, insulin sensitivity                                                                                                                                   | Cases: 18 (5); Non-cases: 19 (6) $\mu\text{m}$ [means (SD)]          | 0.65 (0.39-1.06)   |
| <b>2</b>          | Ferrannini <i>et al.</i> 2013–<br><i>Diabetes</i> | Botnia Prospective Study | 130 cases/412<br>nondiabetic  | Unadjusted, adjusted means NR                                                                                                                                                   | Cases: 1.3 (1.6); Non-cases: 1.3 (1.0), $\mu\text{m}$ [median (IQR)] | 1.00 (0.83-1.20)*  |

SUPPLEMENTARY DATA

|                                                                                                                                                                        |                                                |              |                               |                                                                                                                                                                                 |                                        |                    |
|------------------------------------------------------------------------------------------------------------------------------------------------------------------------|------------------------------------------------|--------------|-------------------------------|---------------------------------------------------------------------------------------------------------------------------------------------------------------------------------|----------------------------------------|--------------------|
| 3                                                                                                                                                                      | Floegel <i>et al.</i> 2013–<br><i>Diabetes</i> | EPIC-Potsdam | 800 cases/2282<br>nondiabetic | Age, sex, alcohol intake, smoking, physical activity, education, coffee intake, red meat intake, whole grain bread intake, prevalent hypertension, BMI, and waist circumference | 29.1 (7.90) $\mu\text{m}$ [means (SD)] | 1.50 (1.43-1.58)** |
| *Converted from means (SD) using standardized mean difference and Hasselblad and Hedge’s method. **Converted using exponential of the B-coefficient. NR, not reported. |                                                |              |                               |                                                                                                                                                                                 |                                        |                    |

SUPPLEMENTARY DATA

**Supplementary Figure 1.** Forest plots and random effects meta-analyses of studies evaluating branched-chain amino acids (BCAAs), amino acids and incidence of type 2 diabetes. The BCAAs are (A) Isoleucine; (B) Leucine; (C) Valine; the aromatic amino acids are (D) Tyrosine and (E) Phenylalanine; (F) Glycine; (G) Glutamine; (H) Alanine; (I) Histidine. Estimates were derived from the most fully adjusted model in each included analysis. Closed circles and horizontal bars represent the point estimates and 95% confidence intervals, respectively, from each study. The meta-analyzed estimate and confidence interval is represented by the open diamond.

A.

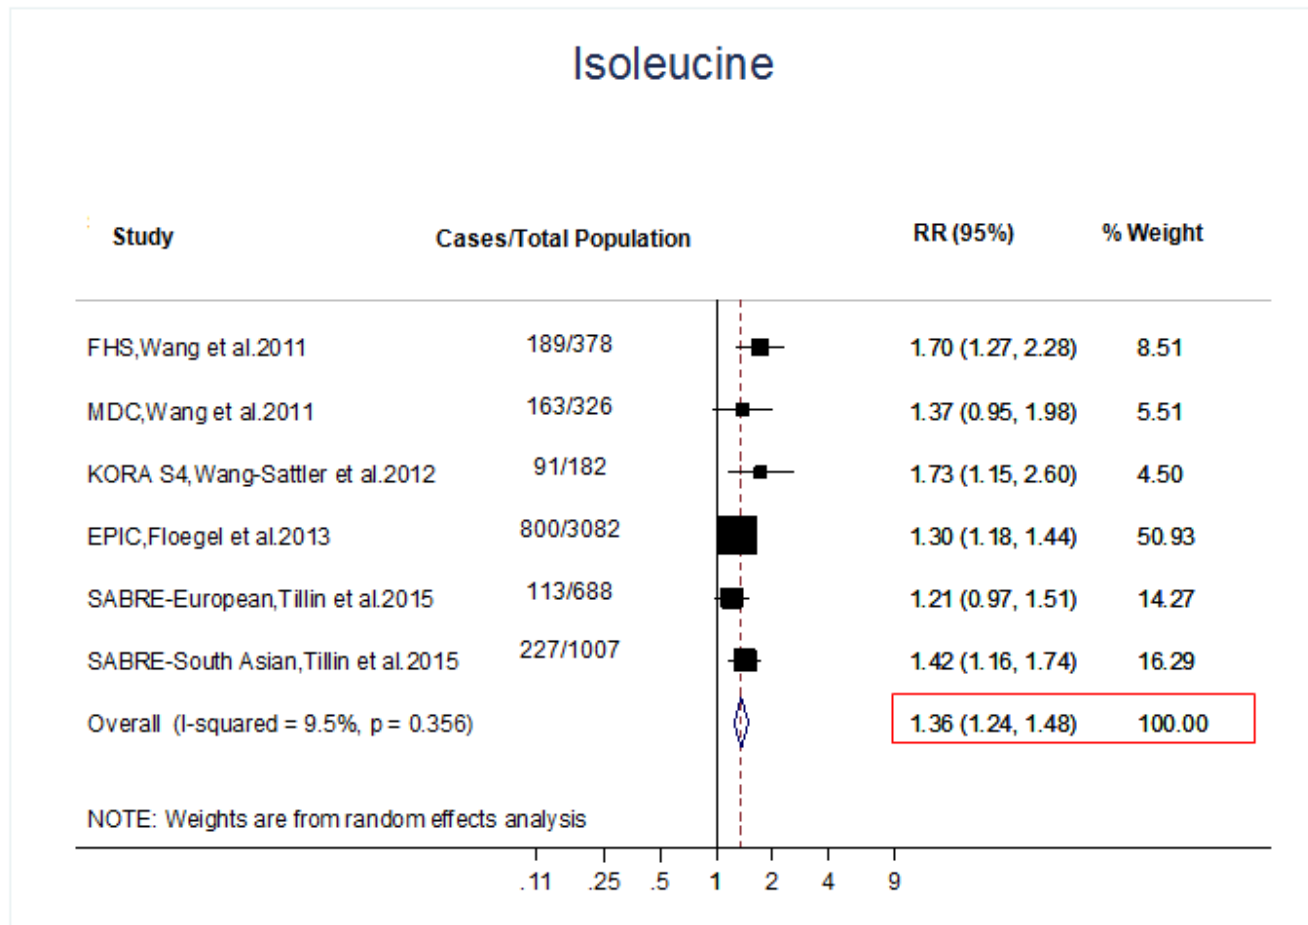

SUPPLEMENTARY DATA

B.

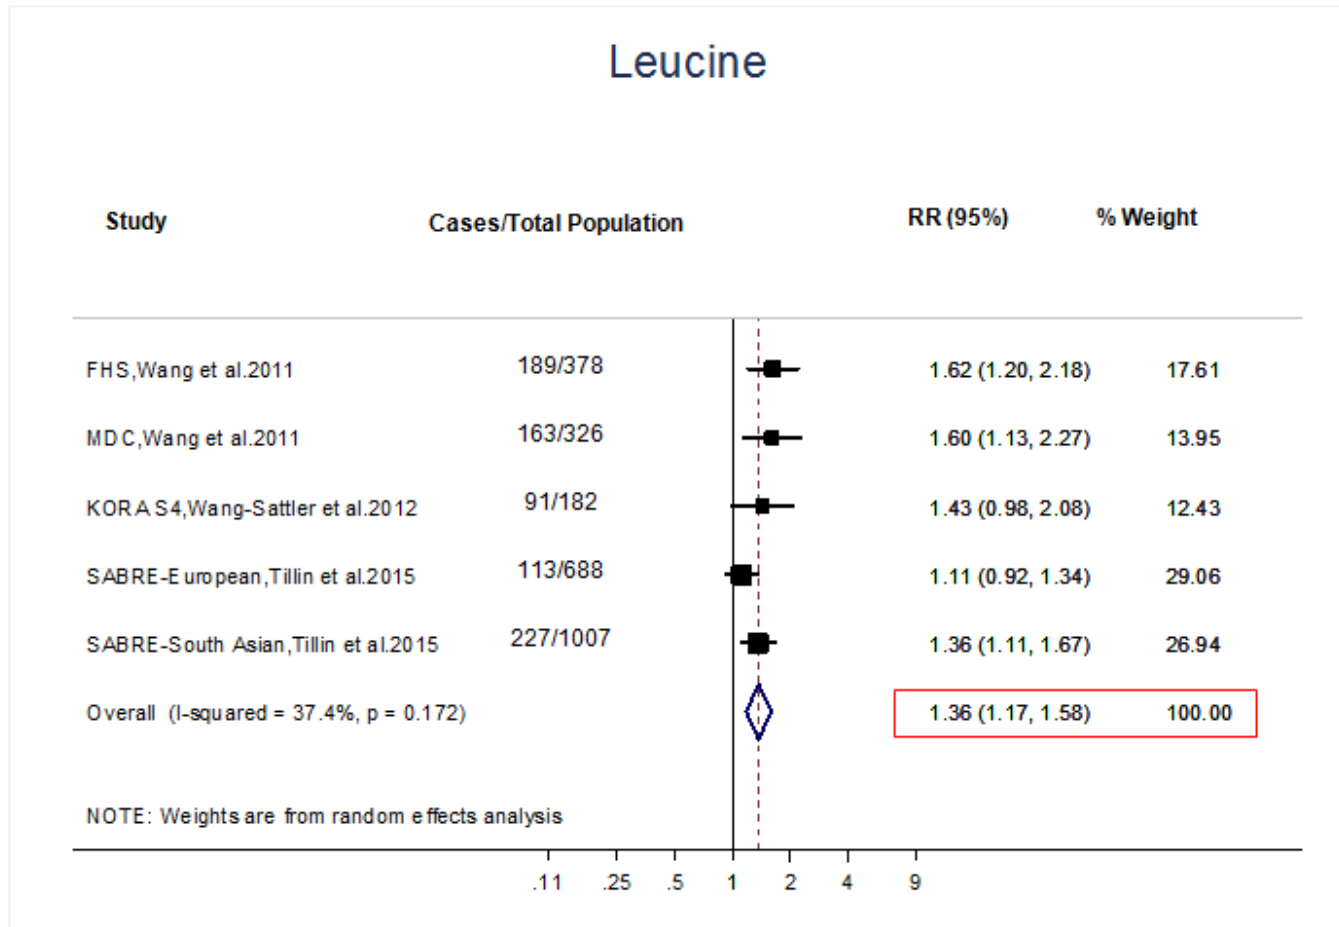

SUPPLEMENTARY DATA

C.

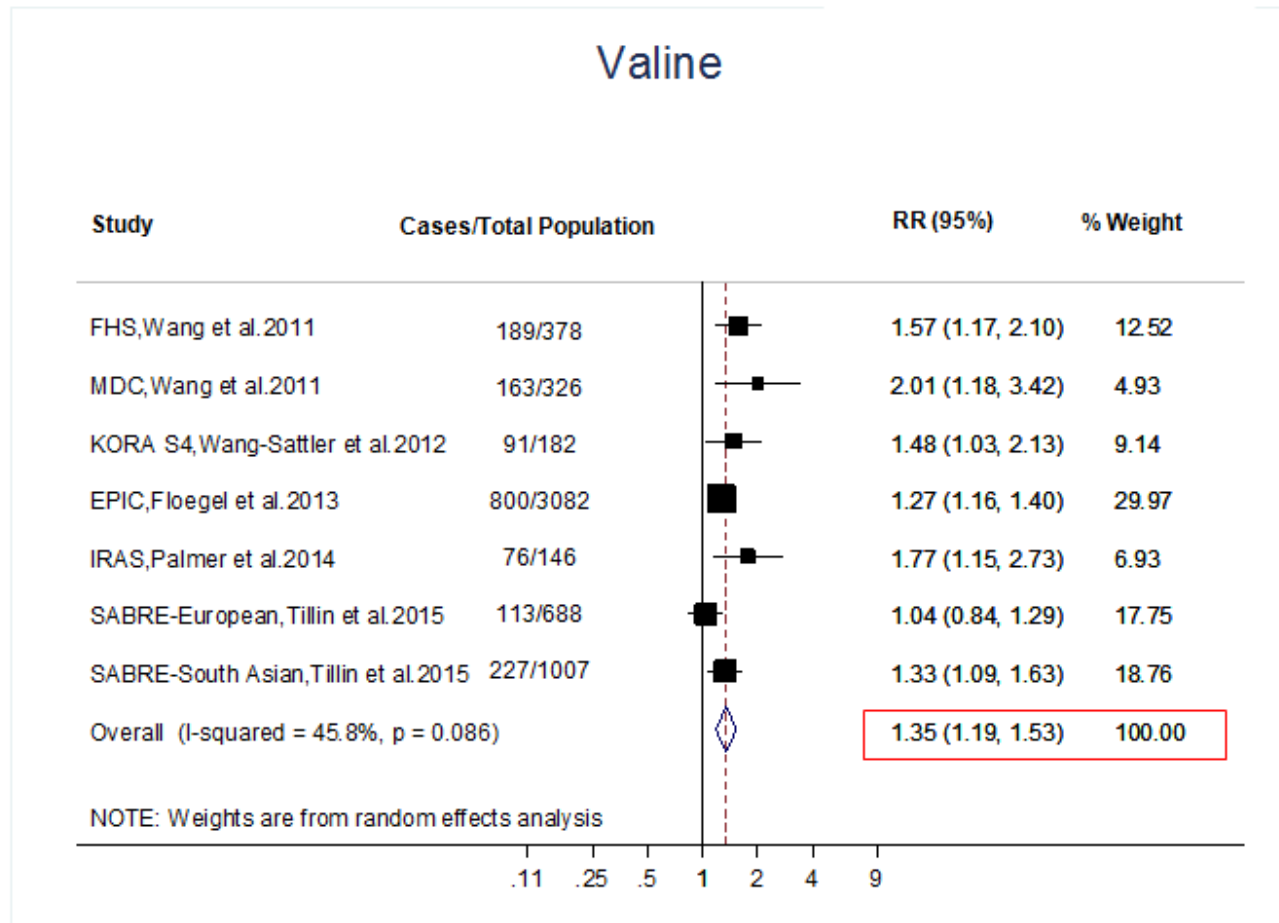

SUPPLEMENTARY DATA

D.

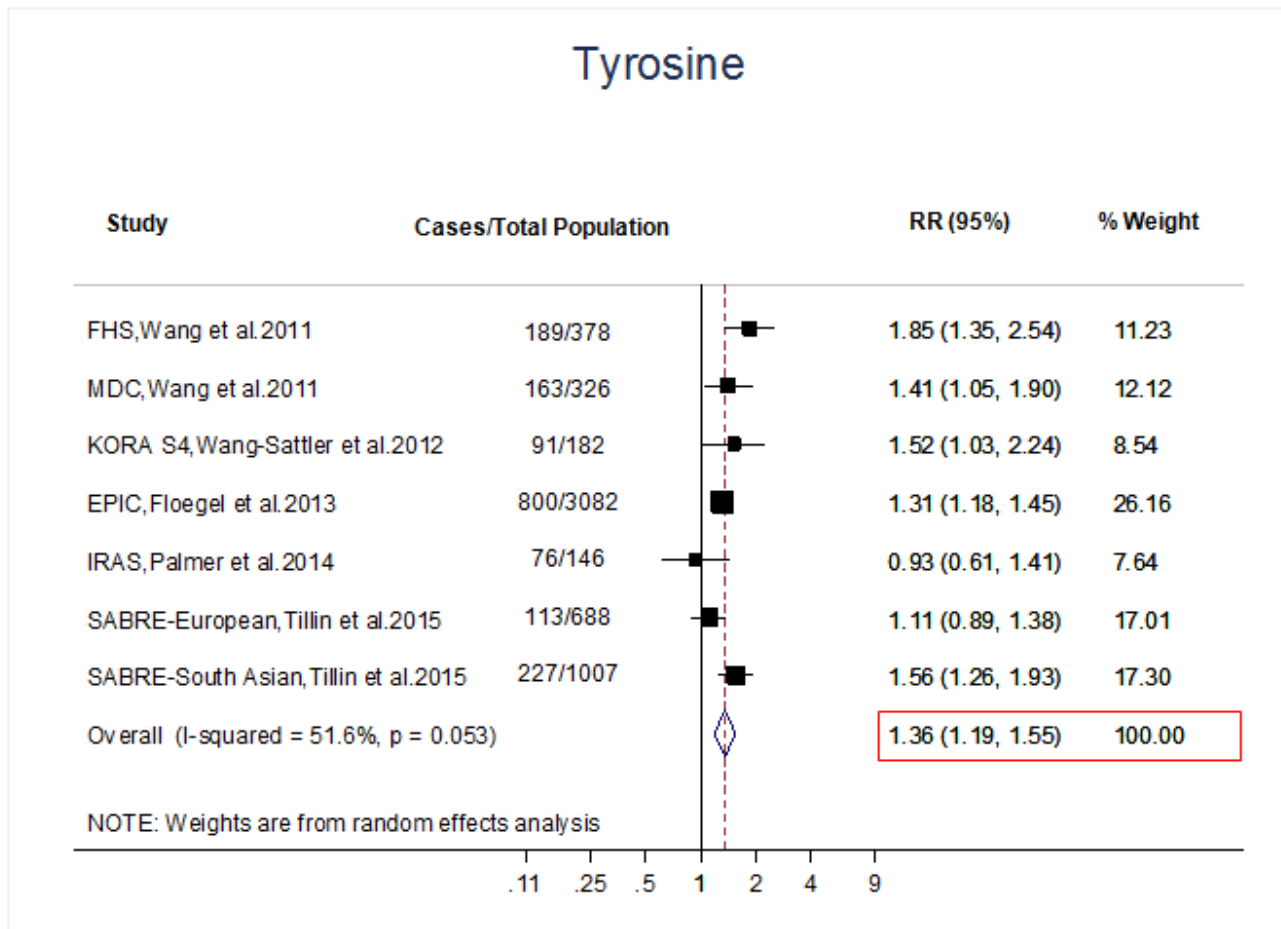

SUPPLEMENTARY DATA

E.

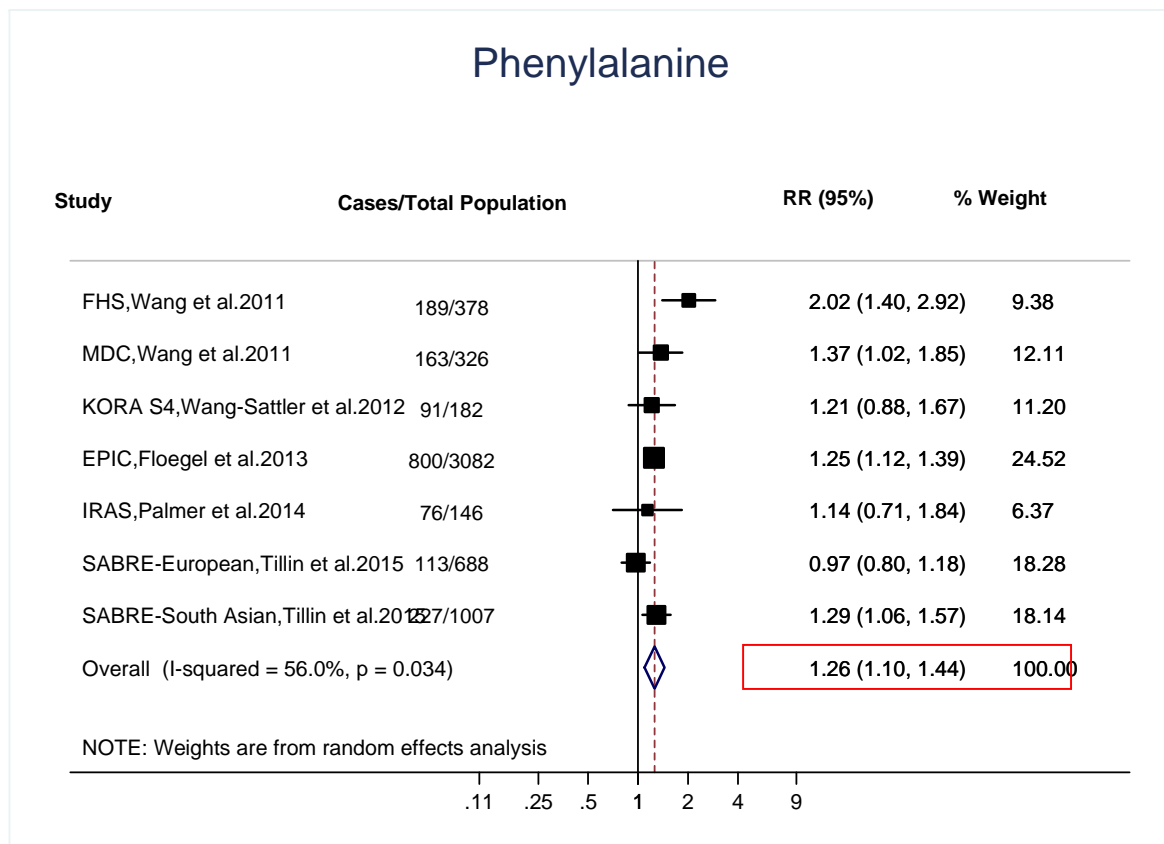



SUPPLEMENTARY DATA

F.

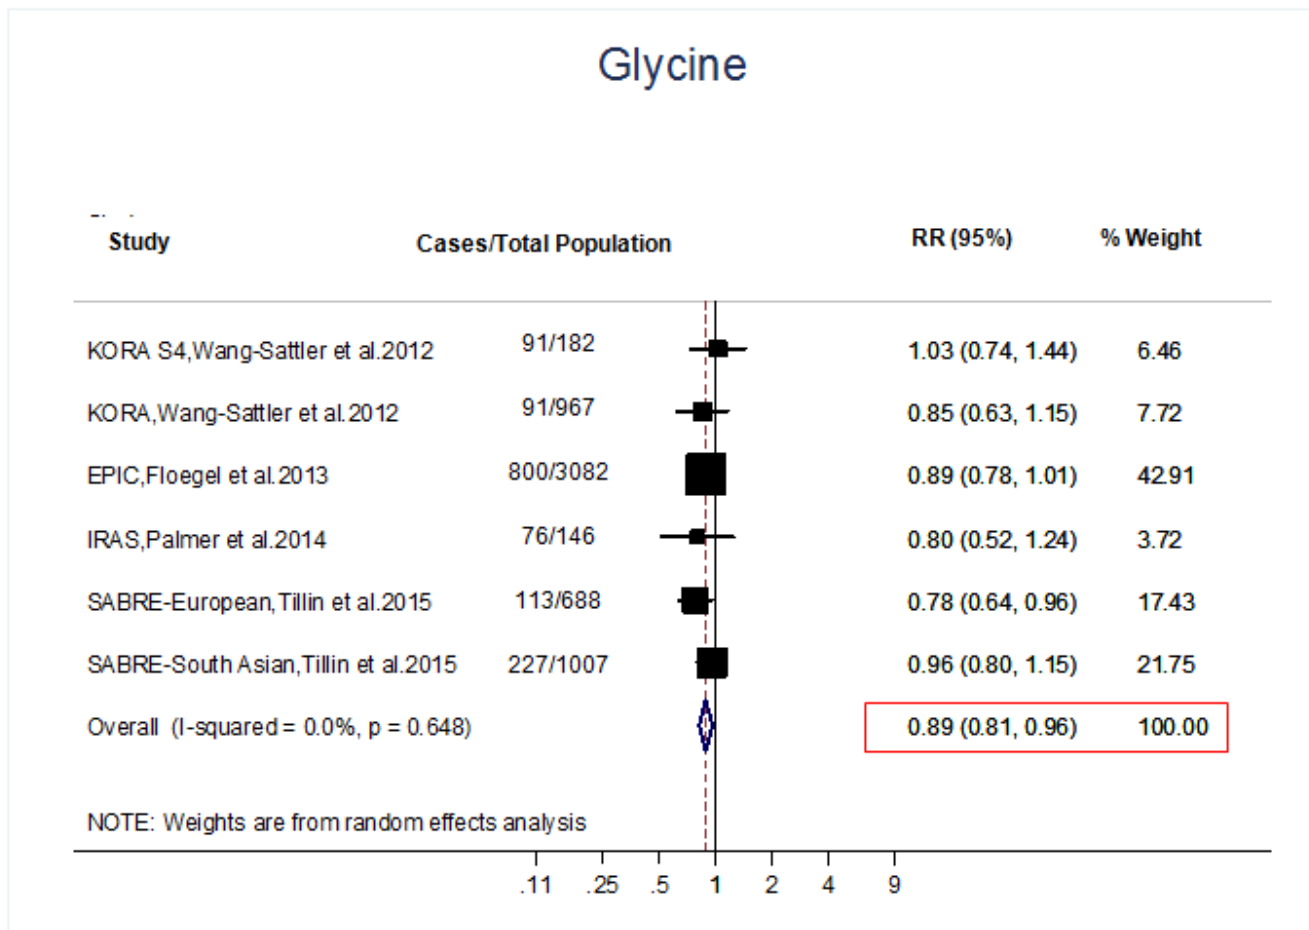

SUPPLEMENTARY DATA

G.

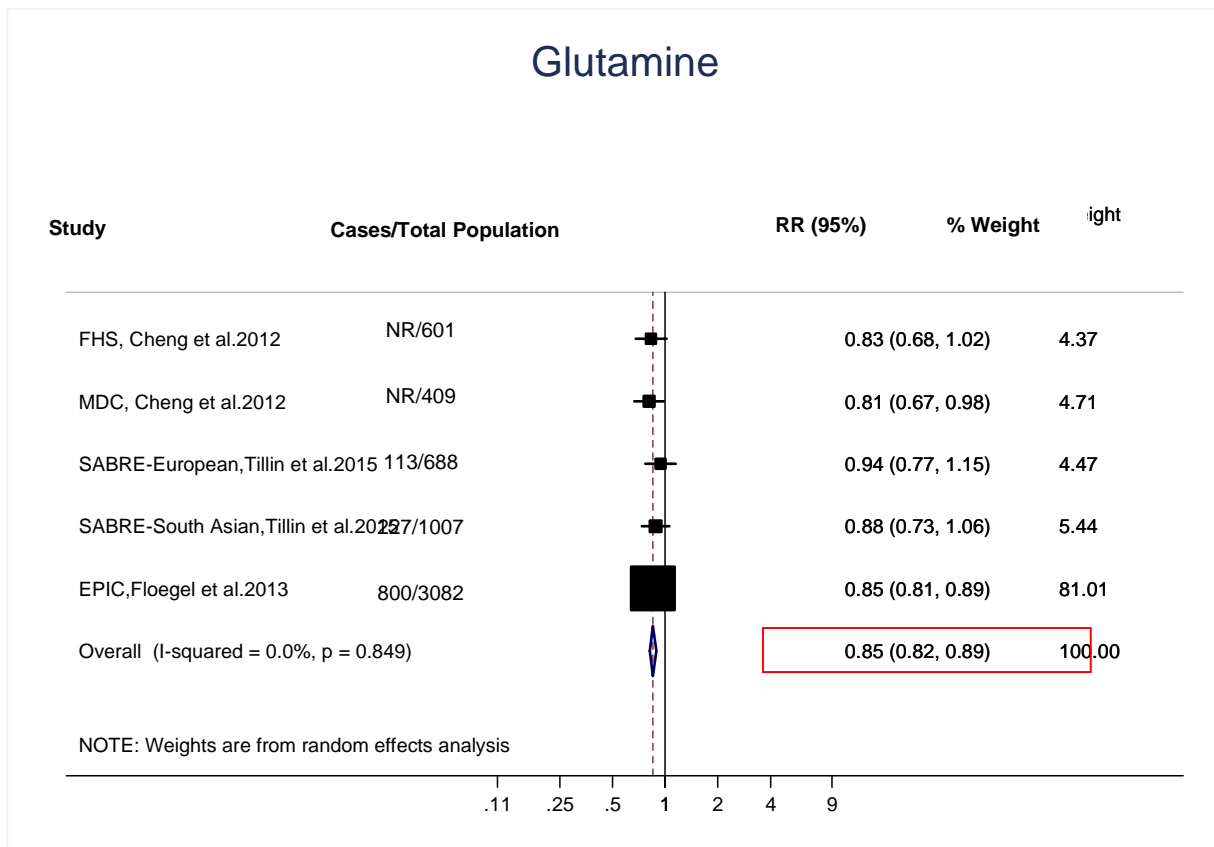

SUPPLEMENTARY DATA

H.

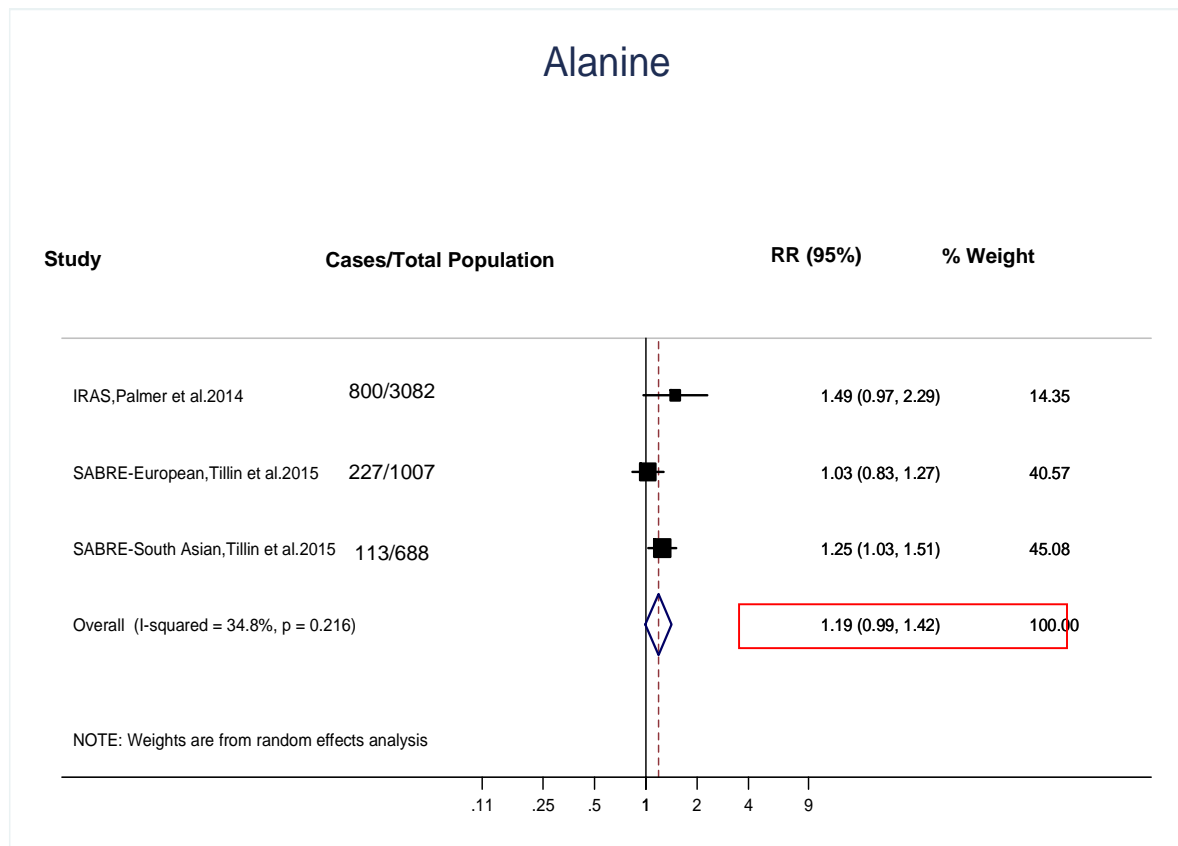

SUPPLEMENTARY DATA

I.

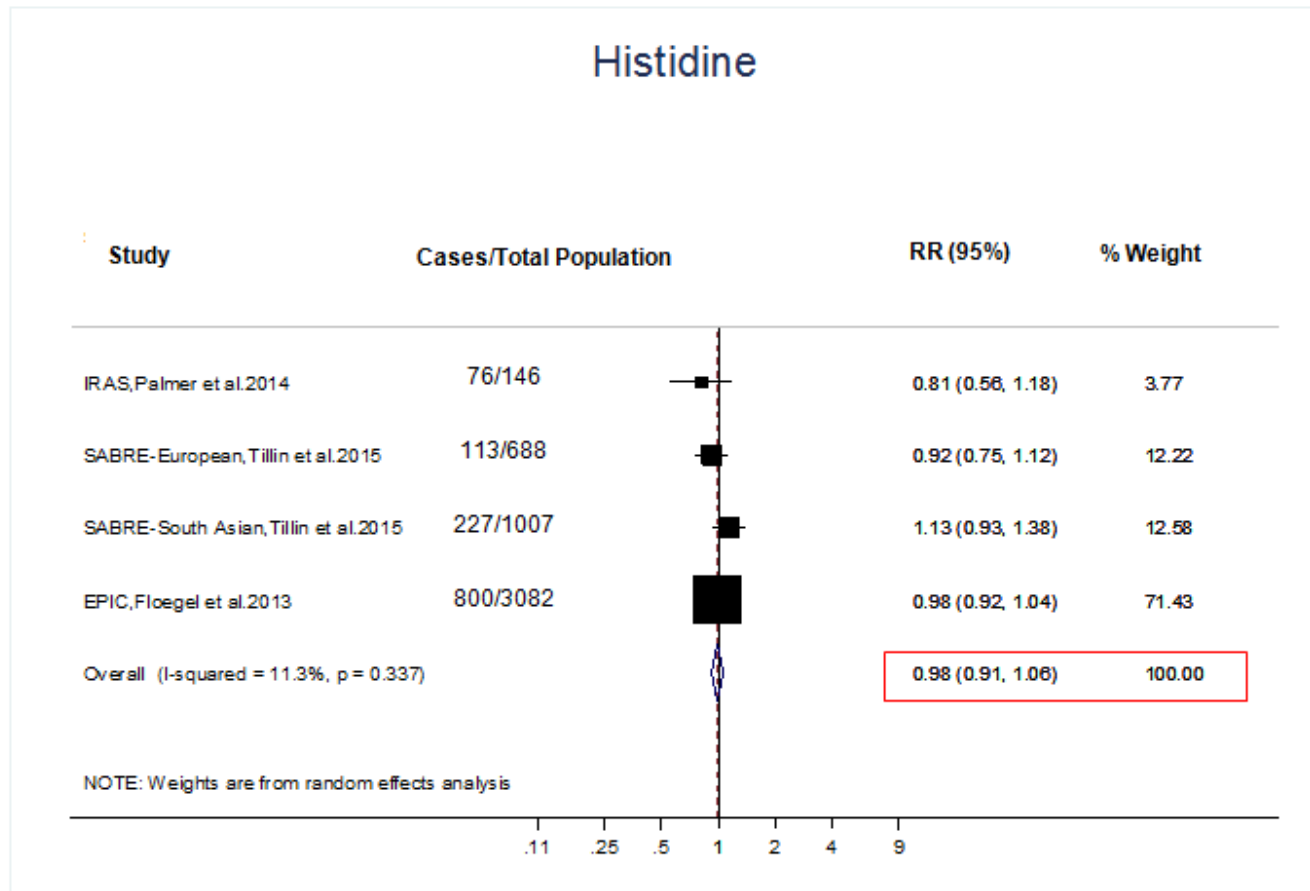

Supplement: DC152251SupplementaryData.pdf [file DC152251SupplementaryData.pdf]
